# Supplementary material for: Strongly coupled exciton–plasmon nanohybrids reveal extraordinary resistance to harsh environmental stressors: temperature, pH and irradiation
Source: Royal Society of Chemistry journal article supplement (doi:10.1039/d0nr04298f), 2020-01-01
Supplement: d0nr04298f1.pdf [file d0nr04298f1.pdf]

## Supporting information

### Strongly coupled exciton-plasmon nanohybrids reveal extraordinary resistance to harsh environmental stressors: temperature, pH and irradiation

Thomas Hendel, Victor Krivenkov, Ana Sánchez-Iglesias, Marek Grzelczak, Yury P. Rakovich\*

#### S1. Rabi splitting energies in Au/J-aggregates –based hybrid nanostructures

| Rabi splitting energy (meV) | Plasmonic nanostructure  | J-aggregates / Dye     | References                                          |
|-----------------------------|--------------------------|------------------------|-----------------------------------------------------|
| 350                         | Au nanocubes on Au film  | PIC                    | Song et al. Nanomaterials 9 (2019) 564              |
| 265                         | Au nanorods ensemble     | cyanine dye JC1        | Melnikau et al. J. Phys. Chem. Lett. 7(2016) 354    |
| 260                         | Au nanostars ensemble    | cyanine dye JC1        | Melnikau et al, Nanoscale Res. Lett. 8 (2013) 1     |
| 250                         | Au nanodisks array       | cyanine dye DPDC       | Zheng et al, Adv. Mater. 22 ( 2010) 3603            |
| 245                         | Au nanoholes array       | carbocyanine dye, THIA | Wang et al. Nanoscale 8 (2016) 13445                |
| 230                         | Au nanodisks dimers      | cyanine dye DPDC       | Schlather et al. Nano Lett. 13 (2013) 3281          |
| 230                         | Au nanovoids             | cyanine dye NK-2751    | Sugawara et al. Phys. Rev. Lett. 97 (2006), 266808  |
| 220                         | Au nanoparticles         | cyanine dye TDBC       | Lekeufack et al, Appl. Phys. Lett. 96 (2010) 253107 |
| 198                         | Au hollow nanopyramids   | PIC                    | Das et al. ChimPhysChemPhys 19 (2018) 27997         |
| 172                         | Au-Ag cubic nanorods     | PIC                    | Liu et al. Phys. Rev. Lett. 118 (2017) 237401       |
| 170                         | Au nanoparticles. dimers | inner salt             | Roller et al. Nano Lett. 9 (2016) 5962              |
| 170                         | Au nanocubes on Au film  | cyanine dye S-2275     | Chen at al. Nano Lett. (2017) 3246                  |
| 155                         | Au nanorods array        | inner salt             | Wurtz et al, 2007 Nano Lett. 7 (2007) 1297          |
| 140                         | Au nanocubes             | PIC                    | Song et al. Nanomaterials 9 (2019) 564              |
| 125                         | Au nanorods array        | porphyrin              | Fedele et al. Appl. Phys. Lett. 108 (2016) 053102   |
| 120                         | Au nanoshells            | cyanine dye DPDC       | Fofang et al. Nano Lett. 8 (2008) 3481              |
| 120                         | Au bipyramids            | thiacarbocyanine dye   | Kirschner et al. Nano Lett. (2018) 442              |
| 110                         | Au nanoslit array        | cyanine dye DPDC       | Vasa et al. Nat. Photon. 7 (2013) 128               |
| 100                         | Au nanoshells            | cyanine dye DPDC       | Fofang et al. Nano Lett 11 (2011) 1556              |
| 60                          | Au film with nanoslits   | cyanine dye DPDC       | Vasa et al, ASC Nano 4 (2010) 7559                  |

#### S2. Rabi splitting energies in Ag/J-aggregates –based hybrid structures

| Rabi splitting energy (meV) | Plasmonic nanostructure   | J-aggregates / Dye    | References                                          |
|-----------------------------|---------------------------|-----------------------|-----------------------------------------------------|
| 500                         | Ag nanodiscs array        | Heptamethine dye      | Todisco et al. ACS Photonics 5 (2017) 143           |
| 450                         | Ag nanodisks array        | cyanine dye TDBC      | Bellessa et al, Phys. Rev. B 80 (2009) 033303       |
| 420                         | Ag, Hexagonal holes array | porphyrine H4TPPS     | Salomon et al, ChemPhysChem 14 (2013) 1882          |
| 400                         | Ag nanoprism              | cyanine dye TDBC      | Wersäll et al. Nano Lett. 17 (2017), 551            |
| 400                         | Ag nanoprisms             | cyanine dye TDBC      | Balci et al. ACS Photonics 3 (2016) 2010            |
| 400                         | Ag nanoprisms             | cyanine dye TDBC      | Balci et al, Opt. Lett. 38 (2013) 4498              |
| 390                         | Ag dimers                 | carbocyanine dye HITC | Nagasawa et al. J. Phys. Chem. Lett. 5(2014) 14     |
| 380                         | Ag nanodiscs (dimers)     | cyanine dye, TDBC     | Todisco et al. ACS Nano 9 (2015) 9691               |
| 350                         | Ag nanodiscs              | cyanine dye, TDBC     | Balci et al. J. Phys. Chem. C 123 (2019), 26571     |
| 310                         | Ag film corrugated        | cyanine dye TDBC      | Symonds et al, New J. Phys. 10 (2008) 065017        |
| 300                         | Ag film                   | cyanine dye TDBS      | Aberra et al. Phys. Rev. Lett. 108 (2012)066401     |
| 300                         | Ag film                   | cyanine dye TDBC      | Bonnand et al. Phys. Rev. B 73 (2006) 245330        |
| 300                         | Ag film with nanoholes    | cyanine dye TDBC      | Kang et al. ACS Photonics 5 (2018) 4046             |
| 295                         | Ag nanoprism              | cyanine dye TDBC      | Zengin et al, Pjys. Rev. Lett. 114 (2015) 157401    |
| 250                         | Ag nanoprism              | cyanine dye TDBC      | Wersäll et al. ACS Photonics 6 (2019) 2570          |
| 250                         | Ag film with nanoholes    | carbocyanine dye      | Ditinger et al, Phys. Rev. B 71 (2005) 035424       |
| 207                         | Ag nanoplatelets          | cyanine dye PIC       | De Lacy et al, Nano Lett. 14 (2014) 2588            |
| 200                         | Ag film with nanoholes    | porphyrine H4TPPS     | Salomon et al. Angew. Chem. 121 (2009) 8904         |
| 180                         | Ag film                   | cyanine dye TDBC      | Bellessa et al. Phys. Rev. Lett. 93(2004) 036404    |
| 180                         | Ag film corrugated        | cyanine dye TDBC      | Bonnand et al. Appl. Phys. Lett. 89 (2006) 231119   |
| 150                         | Ag film                   | cyanine dye TDBC      | Balci et al. Phys. Rev. B 86 (2012) 235402          |
| 123                         | Ag grating                | cyanine dye TDBC      | Zhang et al. Appl. Phys. Lett. 108 (2012) 193111    |
| 120                         | Ag film                   | S2275                 | Chevrier et al. ACS Photonics 5 (2018) 80           |
| 100                         | Ag nanorods               | cyanine dye DBC       | Zengin et al. Sci. Rep. 3 (2013) 3074               |
| 90                          | Ag film                   | cyanine dye DBC       | Bonnand et al. J. Non-Cryst. Solids 352 (2013) 1683 |

### **S3. Experimental**

Optical extinction spectra were recorded using a Cary 50 spectrometer (Agilent Technologies). For measurement of the pH value a FiveGo F2 pH-meter (Mettler-Toledo) has been used.

To study the pH influence on the hybrid nanostructures small amounts of diluted H<sub>2</sub>SO<sub>4</sub> have been added to the samples under vigorous stirring and subsequently pH value and extinction spectra have been measured.

The temperature influence on the hybrid nanostructures has been investigated recording their extinction spectra with an 8453 spectrophotometer equipped with a Peltier temperature controller 89090A 8 (both Agilent).

Photostability experiments have been carried out using a high intensity illuminator MI-150 (Dolan-Jenner Industries) equipped with a low voltage halogen lamp 13629 (Philips). The irradiance was measured with a PMA2200 photometer (Solar Light). The samples were irradiated directly in a quartz cuvette and extinction spectra were recorded after certain time intervals.

A transmission electron microscopy (TEM) image of nanorods obtained using transmission electron microscope FEG-TEM of type JEOL JEM-2100F UHR.

### **S4. Chemicals**

Cyanine dyes 5,5',6,6'-Tetrachloro-1,1',3,3'-tetraethyl-imidacarbocyanine iodide (JC1), tetrachloroauric acid (HAuCl<sub>4</sub>), sodium borohydride (NaBH<sub>4</sub>), hexadecyltrimethylammonium bromide (CTAB), benzyldimethylhexadecylammonium chloride (BDAC), silver nitrate (AgNO<sub>3</sub>), hydrochloric acid (HCl), ascorbic acid (AA) were purchased from Sigma-Aldrich.

### **S5. Synthesis of gold nanorods**

Gold nanorods were prepared using Ag-assisted seeded growth. Seeds were prepared by the reduction of HAuCl<sub>4</sub> (5 mL, 0.25 mM) with NaBH<sub>4</sub> (0.3 mL, 10 mM) in aqueous CTAB solution (100 mM). An aliquot of seed solution (0.12 mL) was added to a growth solution containing CTAB (50 mL, 100 mM), HAuCl<sub>4</sub> (0.5 mL, 50 mM), ascorbic acid

(0.4 mL, 100 mM), AgNO<sub>3</sub> (0.6 mL, 10 mM) and HCl (0.95 mL, 1000 mM). The mixture was left undisturbed at 30 °C for 2 h. The solution was centrifuged twice (8000 rpm, 30 min) and redispersed in BDAC (10 mM) to obtain a final concentration of gold equal to 0.25 mM. The maximum of LSPR of the initial gold nanorods was 860 nm.

### S6. Preparation of J-aggregates and formation of hybrid nanostructures

J-aggregates of the JC1 dye form spontaneously upon dissolution of this dye in water at pH8. The production of the hybrid Au@Ag nanorods and J-aggregates system relies upon the electrostatic interactions between the anionic groups of the J-aggregates and the cationic sites of stabilizing agent CTAB at the surface of bare Au nanorods. An aliquot of ethanol solution of JC1 (20 μL, 0.774 mM) was added to the solution of gold nanorods (2 mL, [Au] = 0.5 mM, [CTAB] = 1mM) under stirring, followed by the addition of NaOH (20 μL, 0.1 M). The solution was left stirring for the next 10 minutes. The sample was centrifuged (6000 rpm, 20 minutes) and redispersed in Mili-Q water.

Z-potential studies of Au nanorods reveal positive potential even after their integration with J-aggregates. This implies that surface charge provided by a stabilizer is not compensated by the charge of J-aggregates and prevails in the hybrid system ensuring colloidal stability.

### S7. Spectral characterization

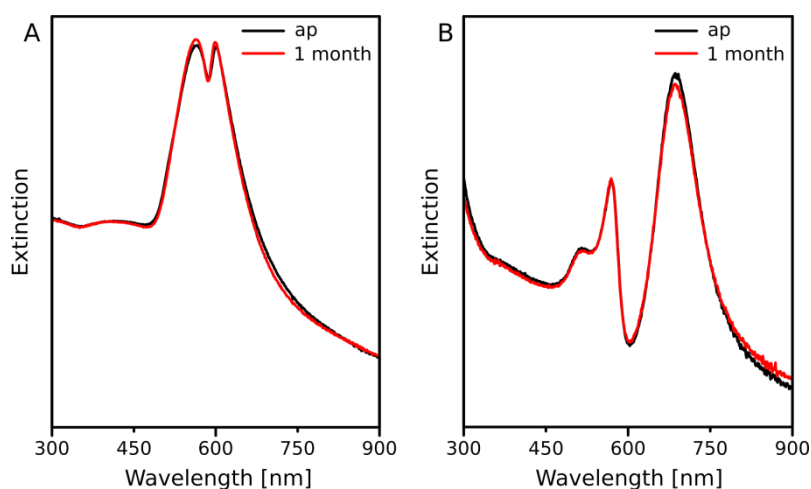

**Figure S1.** Extinction spectra of as-prepared and aged solutions containing hybrids from JC1-based J-aggregates with gold nanospheres (A) and nanorods (B).

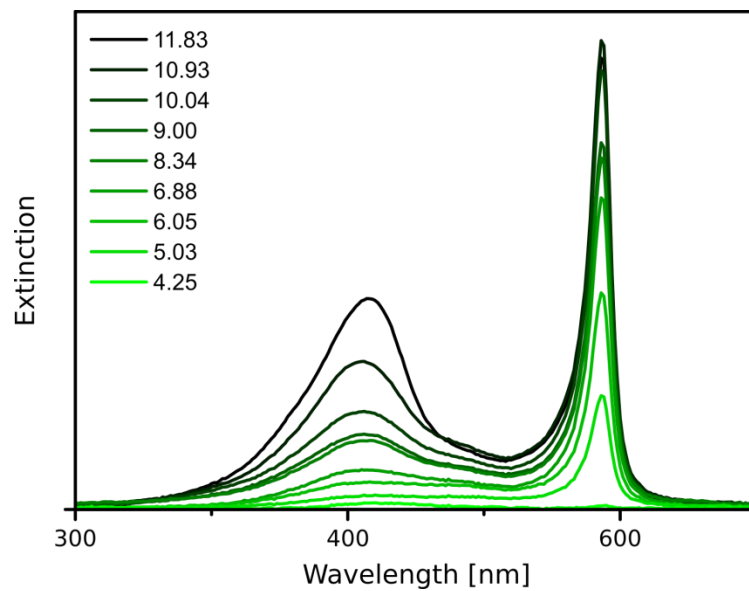

**Figure S2.** Evolution of extinction spectra of a pure aqueous JC1 solution upon decrease of the pH value.
